# Supplementary material for: Operando X-ray absorption spectroscopy of phosphomolybdic acid redox mediators for electrochemical conversion of biomass to green hydrogen
Source: Royal Society of Chemistry journal article supplement (doi:10.1039/d5cy00763a), 2026-01-01
Supplement: d5cy00763a1.pdf [file d5cy00763a1.pdf]

Supplementary Information

## ***Operando* X-ray absorption spectroscopy of phosphomolybdic acid redox mediators for electrochemical conversion of biomass to green hydrogen**

Robert Price <sup>a=</sup>, Lewis MacDonald <sup>a=</sup>, Luke L. Keenan <sup>b=</sup>, William Johnson <sup>a</sup>, Stephen M. Lyth <sup>a</sup>, Jun Li <sup>a</sup> and Edward Brightman <sup>a</sup>

<sup>a</sup>. Strathclyde Incubator for Green Hydrogen Technologies (SigH<sub>2</sub>t), Department of Chemical and Process Engineering, University of Strathclyde, James Weir Building, 75 Montrose Street, Glasgow, G1 1XJ.

<sup>b</sup>. Diamond Light Source Ltd., Harwell Science and Innovation Campus, Fermi Avenue, Didcot, OX11 0DE.

E-mail: edward.brightman@strath.ac.uk

### XAS Experimental conditions

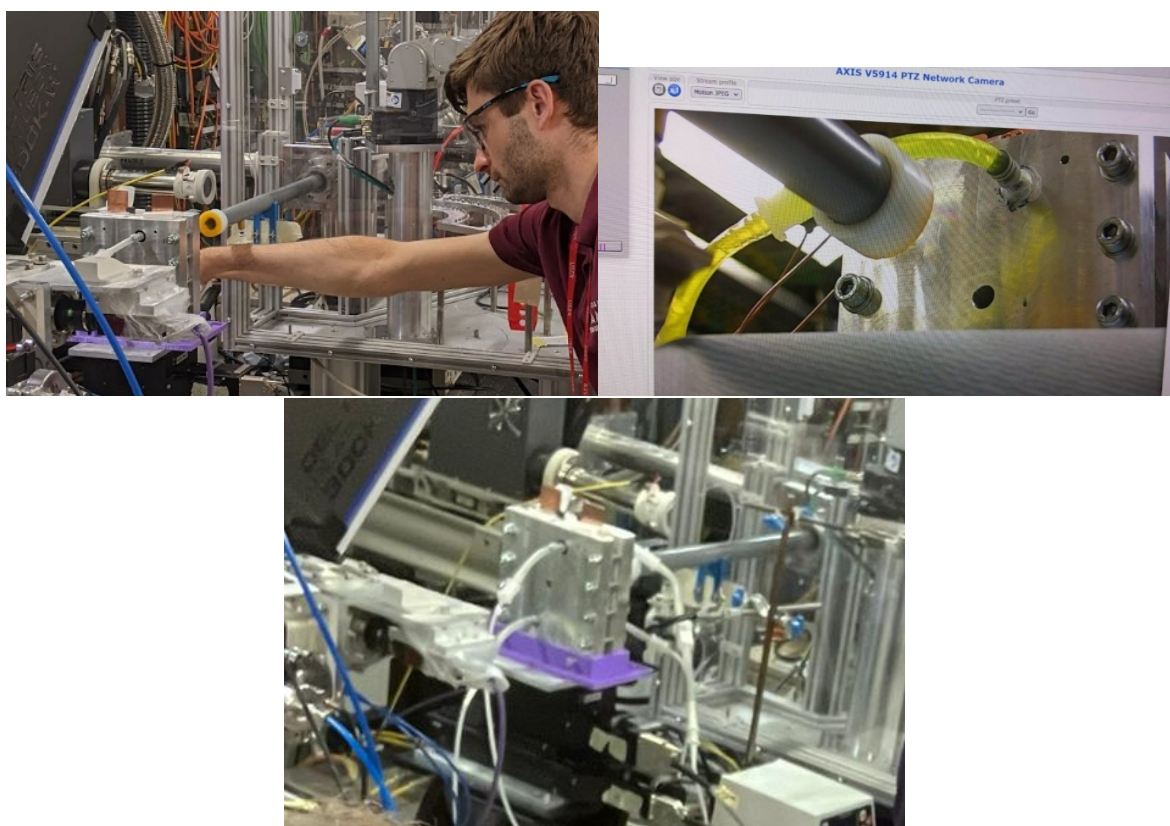

**Figure S1.** A selection of images of the assembled flow cell, situated in position on the sample stage of the B18 beamline at Diamond Light Source.

Table S1: Complete list of standard materials characterised as part of this study.

| Standard Material:                                                   | Purity/Supplier:               | Mass of Standard/mg | Mass of Cellulose/mg |
|----------------------------------------------------------------------|--------------------------------|---------------------|----------------------|
| $\text{MoO}_3$                                                       | Sigma-Aldrich                  | 24.30               | 56.71                |
| $\text{MoO}_2$                                                       | Sigma-Aldrich                  | 21.66               | 58.34                |
| $\text{H}_3[\text{PMo}_{12}\text{O}_{40}] \cdot x\text{H}_2\text{O}$ | Thermo Scientific<br>Chemicals | 32.20               | 48.87                |
| $\text{Na}_2\text{MoO}_4 \cdot 2\text{H}_2\text{O}$                  | Sigma-Aldrich                  | 40.29               | 40.16                |
| $\text{Na}_2\text{MoO}_4$                                            | Sigma-Aldrich                  | 39.64               | 40.59                |
| $(\text{NH}_4)_6\text{Mo}_7\text{O}_{24} \cdot 2\text{H}_2\text{O}$  | Sigma-Aldrich                  | 29.77               | 50.42                |

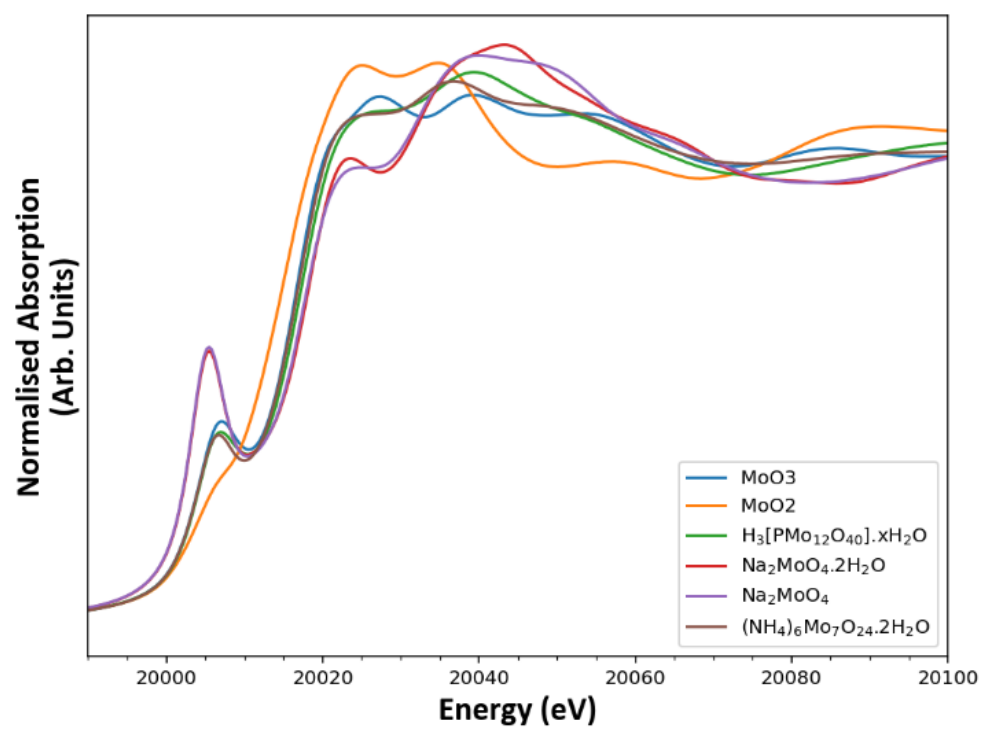

**Figure S2:** XANES spectra of Calibration Standards listed in Table S1

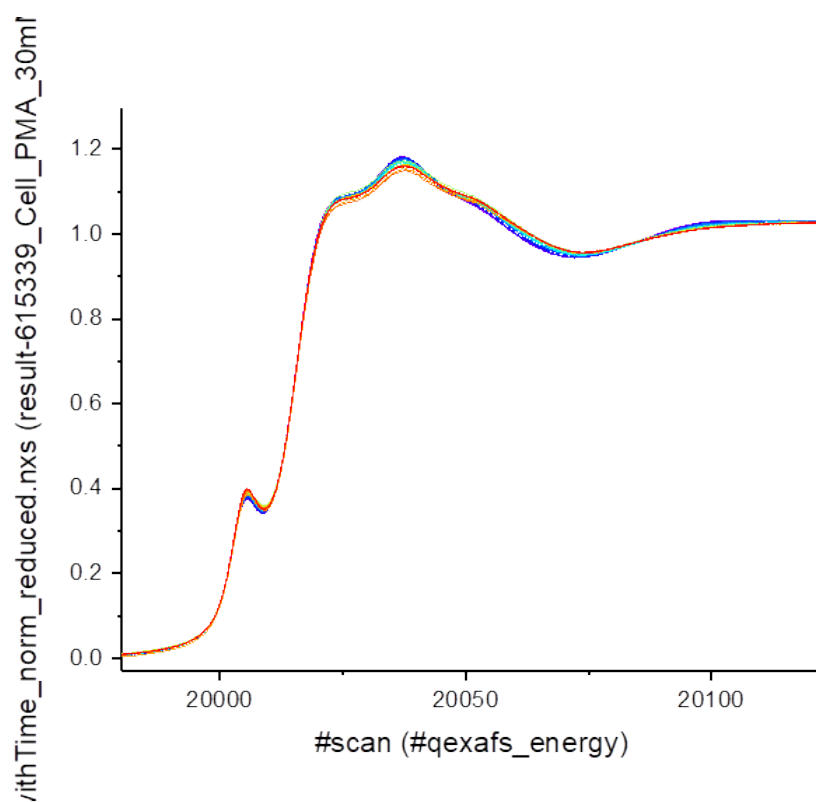

**Figure S3:** Plot of sequential quick XAS spectra obtained during an *operando* reoxidation of the Electrochemically-reduced sample, plotted over a colour gradient from red to blue. Each spectrum took 31.55 seconds.

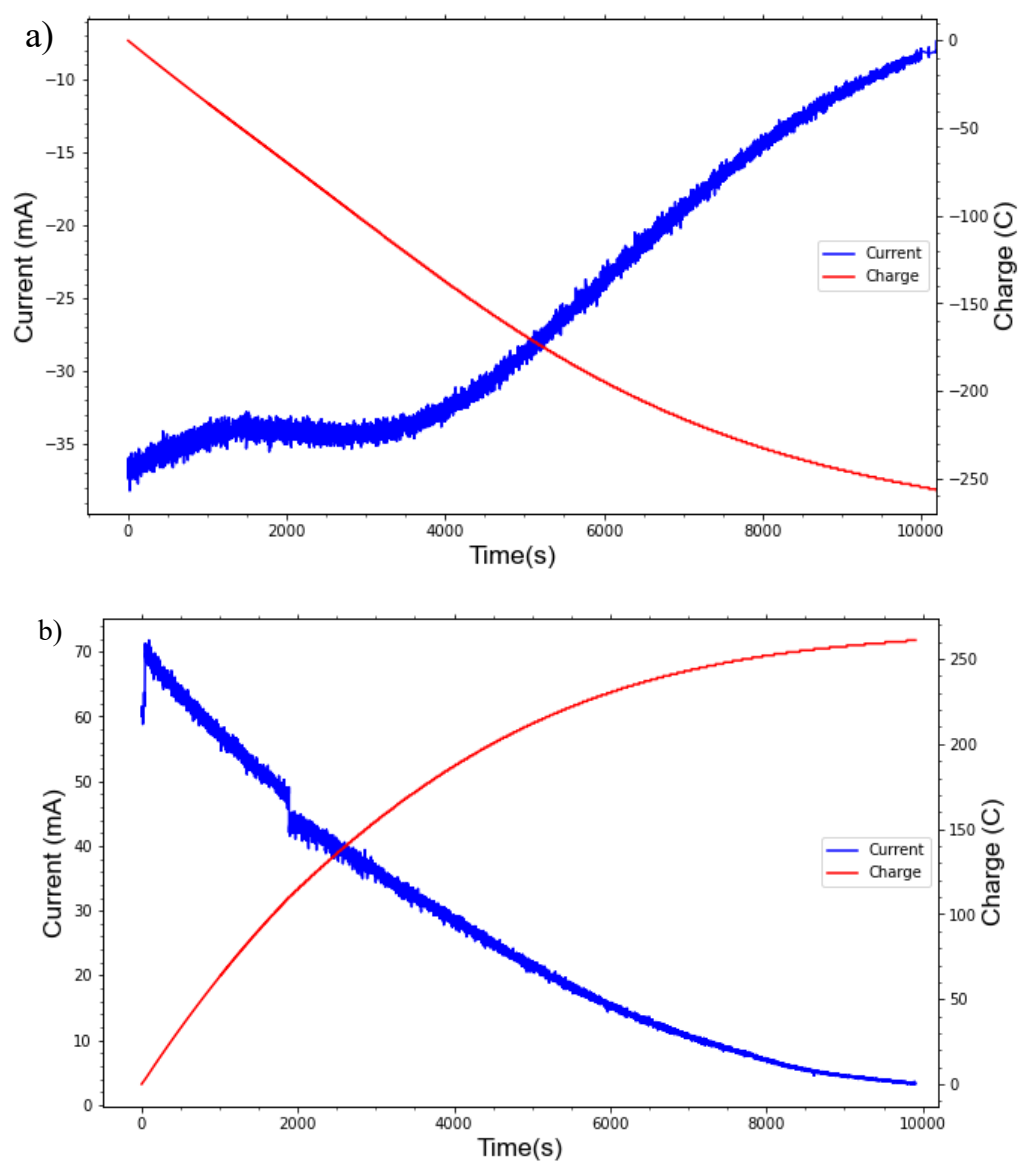

**Figure S4.** Plots of current and charge passage as a function of time for an H-cell operating with a PMA analyte in a) reduction mode and b) oxidation mode.

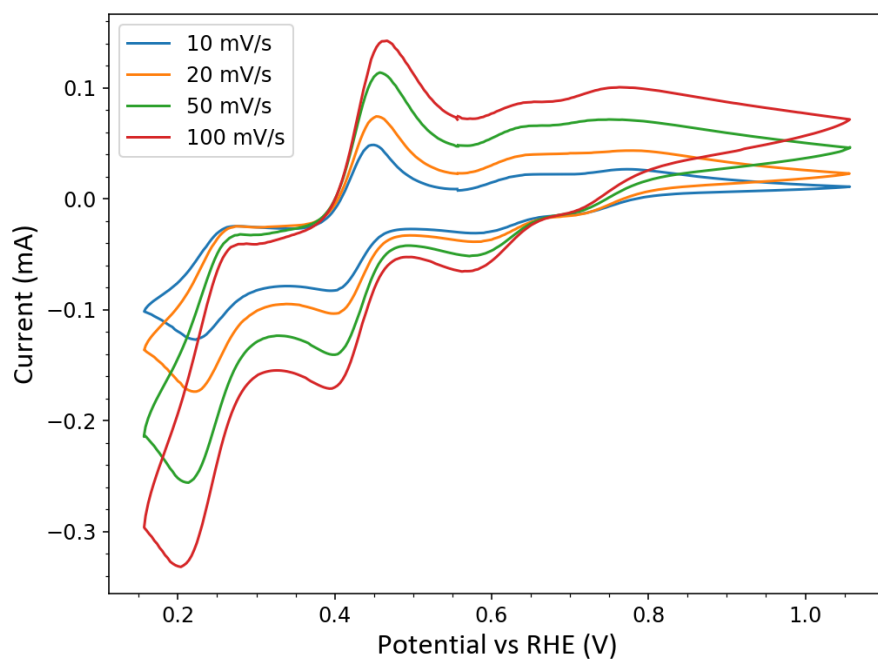

**Figure S5.** Plots of cyclic voltammetry of 0.01 mol dm<sup>-3</sup> PMA at scan rates ranging from 10 to 100 mV/s.

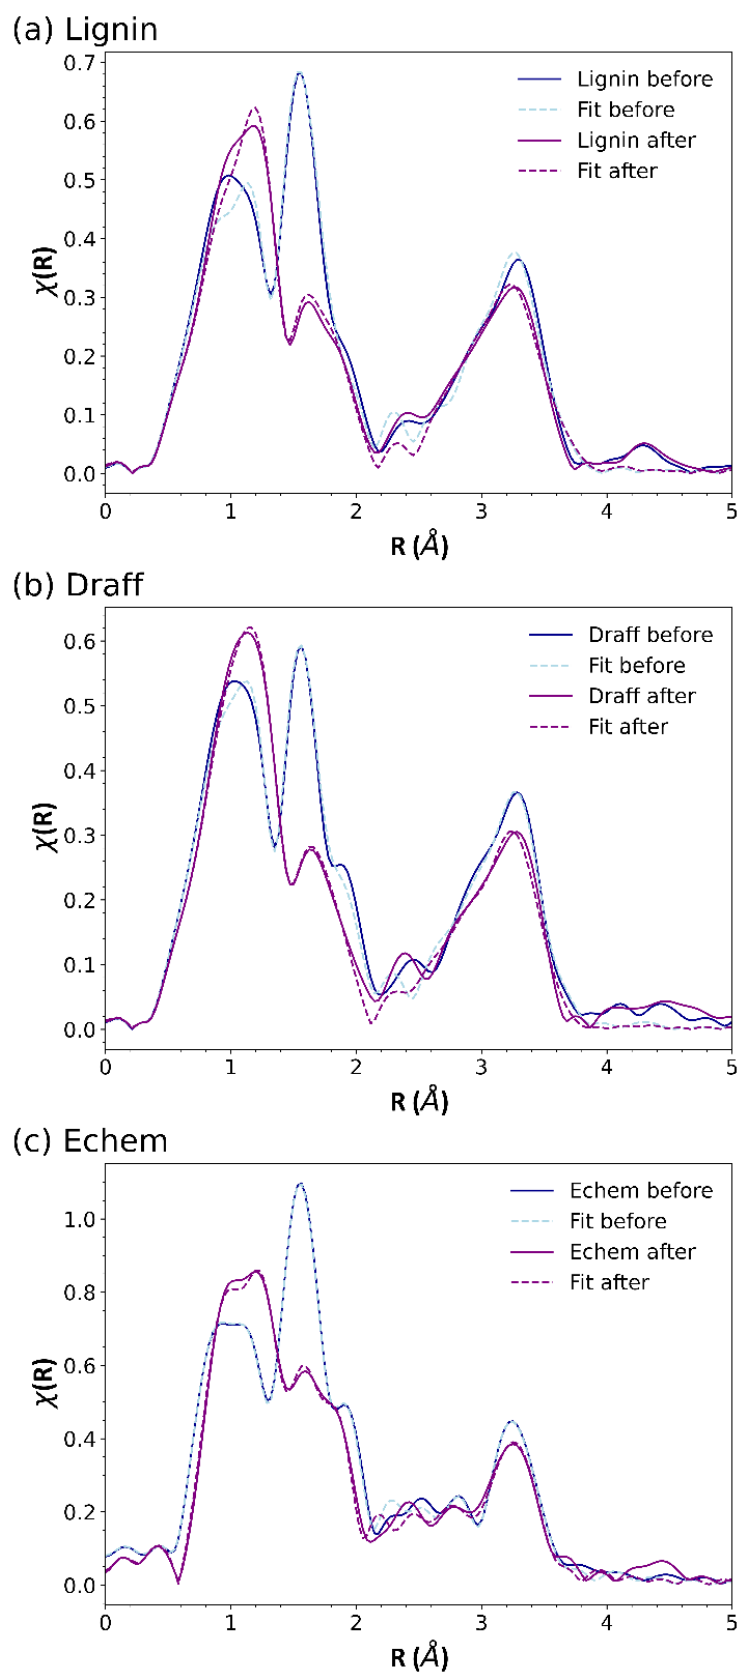

**Figure S6.** Fitting of EXAFS spectra (in R-space) of Lignin, Draff and Echem samples before and after re-oxidation of reduced PMA (starting photoelectron scattering paths obtained from geometrically relaxed DFT calculations and modelled using Artemis software)
